# Supplementary material for: Wildlife Photos on Social Media: A Quantitative Content Analysis of Conservation Organisations’ Instagram Images
Source: MDPI journal article supplement (doi:10.3390/ani12141787), 2022-07-12
Supplement: s1 [file s1]

Table S3. The 10 most represented species in the database by count and percentage of total species (n = 147)

|             | Count | %     |
|-------------|-------|-------|
| Koala       | 93    | 10.48 |
| Kangaroo    | 55    | 6.20  |
| Lizard      | 36    | 4.06  |
| Wallaby     | 33    | 3.72  |
| King Parrot | 32    | 3.61  |
| Frog        | 32    | 3.61  |
| Snake       | 28    | 3.16  |
| Flying fox  | 25    | 2.82  |
| Owl         | 24    | 2.71  |
| Fairy Wren  | 24    | 2.71  |
| Seagull     | 22    | 2.48  |
| Quoll       | 21    | 2.37  |
