# Supplementary material for: Wildlife Photos on Social Media: A Quantitative Content Analysis of Conservation Organisations’ Instagram Images
Source: MDPI journal article supplement (doi:10.3390/ani12141787), 2022-07-12
Supplement: s1 [file s1]

Table S1. Count and percentage of image elements for the final sample (n = 670). Counts may not all be equal due to missing values. Animal Features and Human Features are counted by individual in the image.

| Image Characteristics                       |       |       | Animal Features                     |       |       | Human Features           |       |       |
|---------------------------------------------|-------|-------|-------------------------------------|-------|-------|--------------------------|-------|-------|
|                                             | Count | %     |                                     | Count | %     |                          | Count | %     |
| <b>Is there text on the image?</b>          |       |       | <b>Taxon of the animal</b>          |       |       | <b>Sex of the human</b>  |       |       |
| Yes                                         | 116   | 17.34 | Invertebrate                        | 70    | 7.87  | Male                     | 41    | 27.15 |
| No                                          | 553   | 82.66 | Mollusc                             | 11    | 1.24  | Female                   | 45    | 29.80 |
| <b>What type of image is it?</b>            |       |       | Fish                                | 34    | 3.82  | Undetermined             | 61    | 40.40 |
| Photo                                       | 663   | 99.1  | Bird                                | 261   | 29.36 | <b>Age of the human</b>  |       |       |
| Cartoon                                     | 1     | 0.15  | Mammal                              | 394   | 44.32 | Infant                   | 2     | 1.32  |
| Illustration                                | 4     | 0.6   | Amphibian                           | 32    | 3.6   | Child                    | 14    | 9.27  |
| Computer Drawing                            | 1     | 0.15  | Reptile                             | 87    | 9.79  | Teen                     | 3     | 1.99  |
| <b>What is the image's colour palette?</b>  |       |       | <b>Type of shot of the animal</b>   |       |       | Adult                    | 84    | 55.63 |
| Full Colour                                 | 651   | 97.31 | Full body                           | 540   | 61.22 | Elderly                  | 2     | 1.32  |
| Black and White                             | 12    | 1.79  | Half body                           | 254   | 28.8  | Undetermined             | 46    | 30.46 |
| Obvious Filter                              | 6     | 0.9   | Face                                | 85    | 9.64  | <b>Role of the human</b> |       |       |
| <b>How is the image quality/resolution?</b> |       |       | Close Up                            | 3     | 0.34  | Celebrity                | 3     | 1.99  |
| High                                        | 344   | 51.81 | <b>Where is the animal facing?</b>  |       |       | General Public           | 24    | 15.89 |
| Medium                                      | 242   | 36.45 | Facing Camera                       | 279   | 31.35 | Other                    | 3     | 1.99  |
| Low                                         | 41    | 6.17  | Back to Camera                      | 84    | 9.44  | Undetermined             | 51    | 33.77 |
| Poor                                        | 37    | 5.57  | Side On                             | 397   | 44.61 | Politician               | 1     | 0.66  |
| <b>What style is the image?</b>             |       |       | Face Not Visible                    | 18    | 2.02  | Researcher               | 7     | 4.64  |
| Animal Portrait                             | 622   | 92.84 | Looking at Camera                   | 112   | 12.58 | Vet / Nurse              | 14    | 9.27  |
| Landscape                                   | 20    | 2.99  | <b>Is the animal alive or dead?</b> |       |       | Wildlife Carer           | 16    | 10.60 |
| Human Selfie                                | 27    | 4.03  | Alive                               | 873   | 98.98 | Zookeeper                | 19    | 12.58 |
| Other                                       | 1     | 0.15  | Dead                                | 9     | 1.02  | Conservationist          | 10    | 6.62  |
| <b>What is the background of the image?</b> |       |       | <b>Age of the animal</b>            |       |       | Student                  | 2     | 1.32  |
| Naturalistic                                | 452   | 67.77 | Infant                              | 28    | 3.15  | Wildlife Rescuer         | 1     | 0.66  |

|                                            |     |       |                                    |     |       |                                       |       |       |  |  |
|--------------------------------------------|-----|-------|------------------------------------|-----|-------|---------------------------------------|-------|-------|--|--|
| Human Made                                 | 171 | 25.64 | Juvenile                           | 116 | 13.03 | Type of shot of the human             |       |       |  |  |
| Blank                                      | 31  | 4.65  | Adult                              | 740 | 83.15 | Full Body                             | 24    | 16.67 |  |  |
| Other                                      | 13  | 1.95  | Unknown                            | 6   | 0.67  | Half Body                             | 56    | 38.89 |  |  |
| If the background is man-made, what is it? |     |       | Distance of animal from the camera |     |       | Face                                  | 12    | 8.33  |  |  |
| Home                                       | 14  | 11.57 | Distant                            | 13  | 1.46  | Body Part                             | 52    | 36.11 |  |  |
| Tank                                       | 9   | 7.44  | Far                                | 80  | 8.99  | Is the human wearing a uniform?       |       |       |  |  |
| Zoo                                        | 54  | 44.63 | Medium                             | 299 | 33.6  | Yes                                   | 44    | 29.53 |  |  |
| Vet Clinic                                 | 10  | 8.26  | Close                              | 445 | 50    | No                                    | 105   | 70.47 |  |  |
| Street                                     | 3   | 2.48  | Very Close                         | 53  | 5.96  | Is the human touching an animal?      |       |       |  |  |
| Other                                      | 31  | 25.62 | Is the animal brightly coloured?   |     |       | Yes                                   | 100   | 66.23 |  |  |
| Are there man-made objects in the image?   |     |       | Yes                                | 236 | 26.67 | No                                    | 51    | 33.77 |  |  |
| Yes                                        | 137 | 20.45 | No                                 | 649 | 73.33 | Is the human holding an animal?       |       |       |  |  |
| No                                         | 533 | 79.55 |                                    |     |       | Yes                                   | 75    | 49.67 |  |  |
| Is the image graphic?                      |     |       |                                    |     |       | No                                    | 76    | 50.33 |  |  |
| Yes                                        | 11  | 1.64  |                                    |     |       | Is the human feeding an animal?       |       |       |  |  |
| No                                         | 659 | 98.36 |                                    |     |       | Yes                                   | 8     | 5.44  |  |  |
| Is there a human in the image?             |     |       |                                    |     |       | No                                    | 139   | 94.56 |  |  |
| Yes                                        | 116 | 17.39 |                                    |     |       | Distance of the human from the animal |       |       |  |  |
| No                                         | 551 | 82.61 |                                    |     |       | Touching                              | 98    | 67.59 |  |  |
| Close ~30cm                                |     |       |                                    |     |       | 24                                    | 16.55 |       |  |  |
| Far ~1m                                    |     |       |                                    |     |       | 15                                    | 10.34 |       |  |  |
| Very Far ~5m+                              |     |       |                                    |     |       | 8                                     | 5.52  |       |  |  |
