# Supplementary material for: Wildlife Photos on Social Media: A Quantitative Content Analysis of Conservation Organisations’ Instagram Images
Source: MDPI journal article supplement (doi:10.3390/ani12141787), 2022-07-12
Supplement: s1 [file s1]

Table S2. Mean and Median counts of the number of animals and humans within an image.

| Variable                       | Mean  | Median |
|--------------------------------|-------|--------|
| Number of Animals in the image | 1.674 | 1      |
| Number of Humans in the image  | 0.241 | 0      |
